# Supplementary material for: The Enigmatic HOX Genes: Can We Crack Their Code?
Source: MDPI journal article supplement (doi:10.3390/cancers11030323), 2019-03-07
Supplement: s1 [file s1]

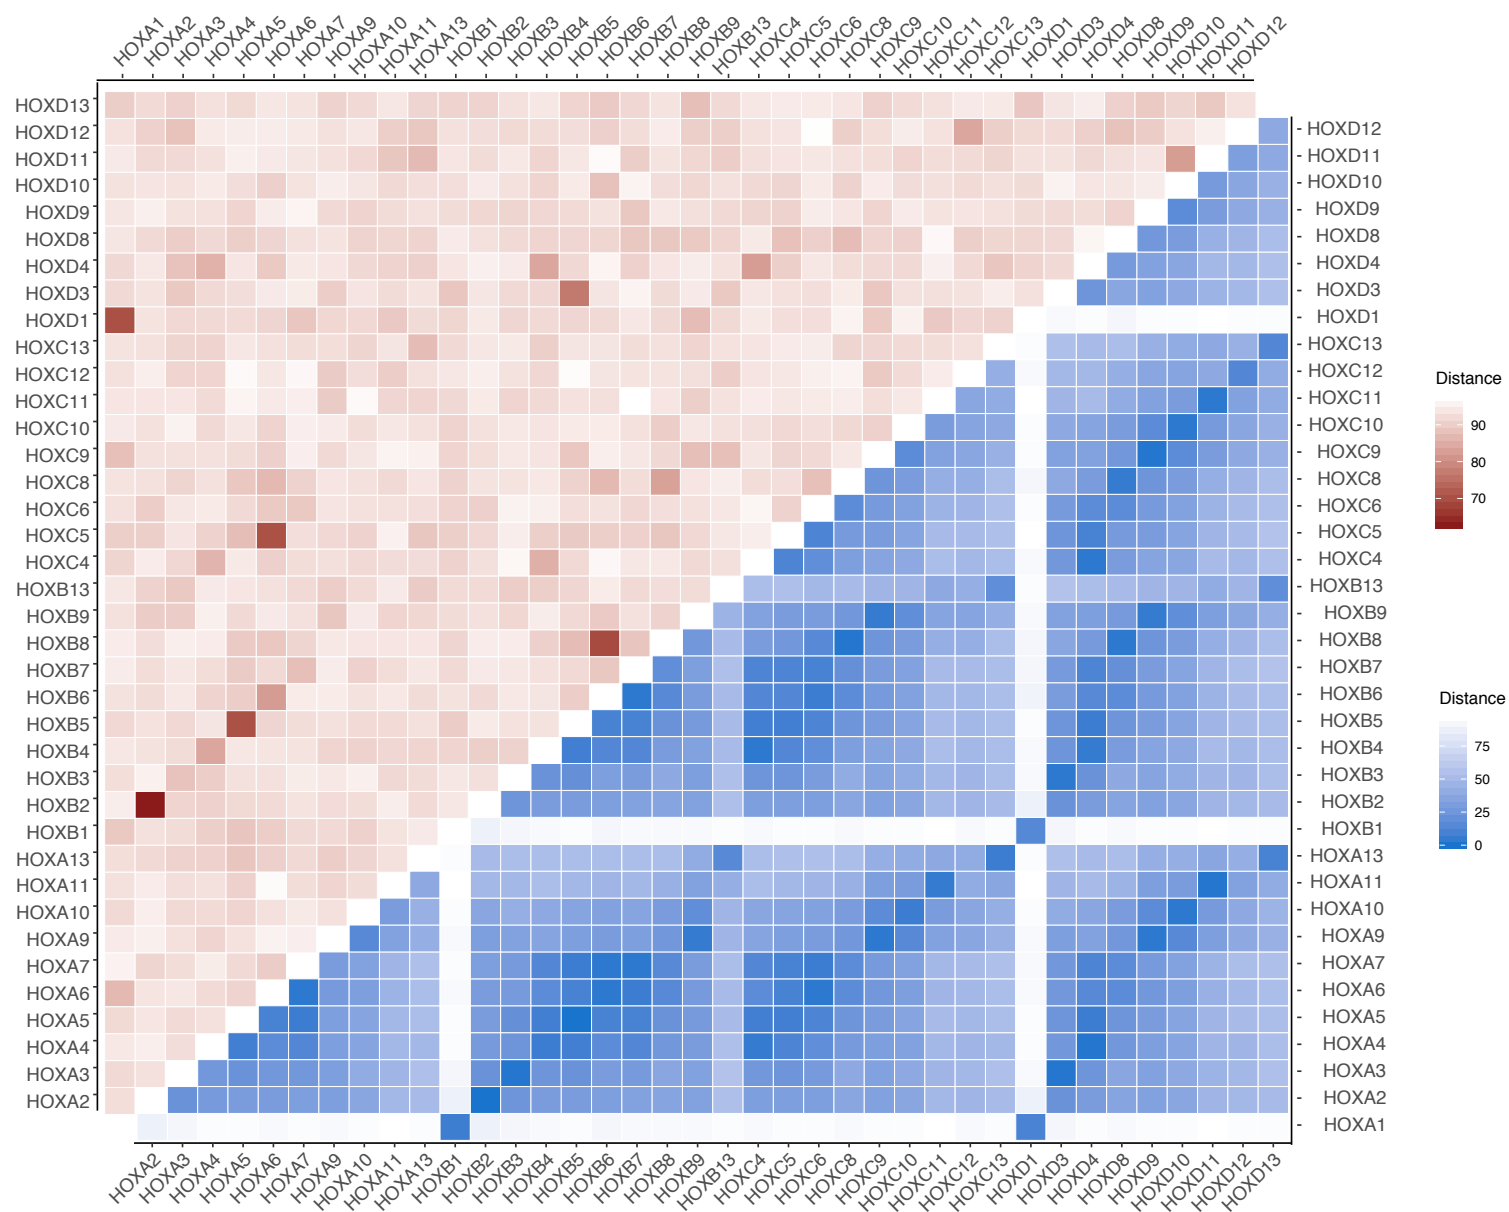

**Luo: Supplemental Figure S1. Phylogenetic analysis of the 39 human HOX genes.** Shown is distance matrix comparing the full-length protein sequences of all HOX proteins (left top triangle; pink squares) and a distance matrix comparing the homeodomain sequences of all HOX proteins (right bottom triangle; blue squares); matrices were created using distmat ([www.bioinformatics.nl/cgi-bin/emboss/distmat/](http://www.bioinformatics.nl/cgi-bin/emboss/distmat/)). Color legend: Distance: the darker the color, the more similar are the two proteins and the lighter the color the less similar are the two proteins. The HOX sequences were retrieved from RefSeq ([ncbi.nlm.nih.gov/refseq/](http://ncbi.nlm.nih.gov/refseq/)) and the homeodomains were annotated using Pfam ([pfam.xfam.org](http://pfam.xfam.org)). See Table S1 for all distance values.
